# Supplementary material for: The Association of the Second to the Fourth Digit Ratio with Prostate Cancer Diagnosed by Magnetic Resonance Imaging-Transrectal Ultrasound Fusion Biopsy: A Comperative Analytical Cross-Sectional Analysis of Prospectively Recorded Data
Source: Research Square preprint supplement (doi:10.21203/rs.3.rs-4934408/v1), 2024-10-21
Supplement: Supplementary file 1 [file 01b8cb419355fe224de6bc1a.docx]

**Table-3:** Comparison of right hand 2D:4D ratio between the groups

| **Groups**  **Variable** | **Study group**  (Overall prostate cancer)  (n = 160) | **Control group**  (Non- cancer)  (n = 368) | | ***p value*** |
| --- | --- | --- | --- | --- |
| **Right hand 2D:4D ratio,** *median (min.-max.)* | 0,96 (0,86-1,11) | 0,96 (0,71-1,14) | ,222**d** | |

**2D:4D:** second digit-to-fourth digit

**d:** Independent-Samples Mann-Whitney U Test
