# Supplementary material for: The Association of the Second to the Fourth Digit Ratio with Prostate Cancer Diagnosed by Magnetic Resonance Imaging-Transrectal Ultrasound Fusion Biopsy: A Comperative Analytical Cross-Sectional Analysis of Prospectively Recorded Data
Source: Research Square preprint supplement (doi:10.21203/rs.3.rs-4934408/v1), 2024-10-21
Supplement: Supplementary file 2 [file 5b3fcdabde8822bd7c54896d.docx]

**Table-1:** Comparison of demographic characteristics and comorbidities

| **Groups**  **Variables** | **Study group**  (Overall prostate cancer)  (n = 160) | **Control group**  (Non- cancer)  (n = 368) | ***p value*** |
| --- | --- | --- | --- |
| **Age (years),** *mean ± sd* | 63,45 ± 6,16 | 60,80 ± 6,48 | **<,001a** |
| **BMI (kg/m²),**  *mean ± sd* | 27,62 ± 3,47 | 27,46 ± 3,49 | .61**a** |
| **Comorbidity,** *n (%)*  metabolic syndrome (+)  metabolic syndrome (-) | 31 (18,5%)  129 (81,5%) | 44 (12,2%)  324 (87,8%) | .076**b** |
|  |  |  |  |

**sd:** standard deviation, **BMI:** Body mass index,

**a:** Independents samples T test

**b:** Chi-square test (continuity correction)
