# Supplementary material for: The Association of the Second to the Fourth Digit Ratio with Prostate Cancer Diagnosed by Magnetic Resonance Imaging-Transrectal Ultrasound Fusion Biopsy: A Comperative Analytical Cross-Sectional Analysis of Prospectively Recorded Data
Source: Research Square preprint supplement (doi:10.21203/rs.3.rs-4934408/v1), 2024-10-21
Supplement: Supplementary file 3 [file d48fd6e0eb350af11d5b5fad.docx]

**Table-4:** Comparison of right hand 2D:4D ratio between the csPCa patient group and control group

| **Groups**  **Variable** | **Study subgroup**  **(csPCa)**  (n = 95) | | **Control group**  (Non- cancer)  (n = 368) | | ***p value*** |
| --- | --- | --- | --- | --- | --- |
| **Right hand 2D:4D ratio,** *median (min.-max.)* | 0,96 (0,86-1,09) | 0,96 (0,71-1,14) | | ,78**e** | |

**2D:4D:** second digit-to-fourth digit, **csPCa:** clinically significant prostate cancer

**e:** Independent-Samples Mann-Whitney U Test
