# Supplementary material for: The Association of the Second to the Fourth Digit Ratio with Prostate Cancer Diagnosed by Magnetic Resonance Imaging-Transrectal Ultrasound Fusion Biopsy: A Comperative Analytical Cross-Sectional Analysis of Prospectively Recorded Data
Source: Research Square preprint supplement (doi:10.21203/rs.3.rs-4934408/v1), 2024-10-21
Supplement: Supplementary file 4 [file e72b580b40f0c15d2ad51f22.docx]

**Table-2:** Comparison of PSA derivates, prostatic lesion characteristics, and biopsy features between the groups

| **Groups**  **Variables** | **Study group**  (Overall prostate cancer)  (n = 160) | **Control group**  (Non- cancer)  (n = 368) | ***p value*** |
| --- | --- | --- | --- |
| **Total PSA,** *median (min.-max.)* | 7,4 (2,4-290) | 6,3 (1,4-39,2) | **<,001c** |
| **DRE findings,** *n (%)*  *positive*  *negative* | 48 (28,6%)  120 (71,4%) | 23 (6,4%)  337 (93,6%) | **<,001d** |
| **PSA density,** *median (min.-max.)* | 0,16 (0,04-5,63) | 0,11 (0,02-1,21) | **<,001c** |
| **Prostate volume,** *median (min.-max.)* | 46 (9-275) | 57,5 (12-209) | **<,001c** |
| **Number of significant lesions on the mp-MRI,** *median (min.-max.)* | 1 (1-3) | 1 (1-4) | ,95c |
| **Total number of cores in biopsy,** *median (min.-max.)* | 17 (8-24) | 17 (5-22) | ,029c |
| **csPCa,** *n (%)* | 96 (60%) | 0 | ***NA*** |

**PSA:** prostate specific antigen, **DRE:** digital rectal examination, **mp-MRI:** multiparametric magnetic resonance imaging, **csPCa:** clinically significant prostate cancer, ***NA:*** not available

**c:** Independent-Samples Mann-Whitney U Test

**d:** Chi-square test (continuity correction)
